# Supplementary material for: Integrated Physiological and Metabolomic Analyses of the Effect of Potassium Fertilizer on Citrus Fruit Splitting
Source: MDPI journal article supplement (doi:10.3390/plants11040499), 2022-02-12
Supplement: s1 [file s1]

## Supplementary material

### Figures

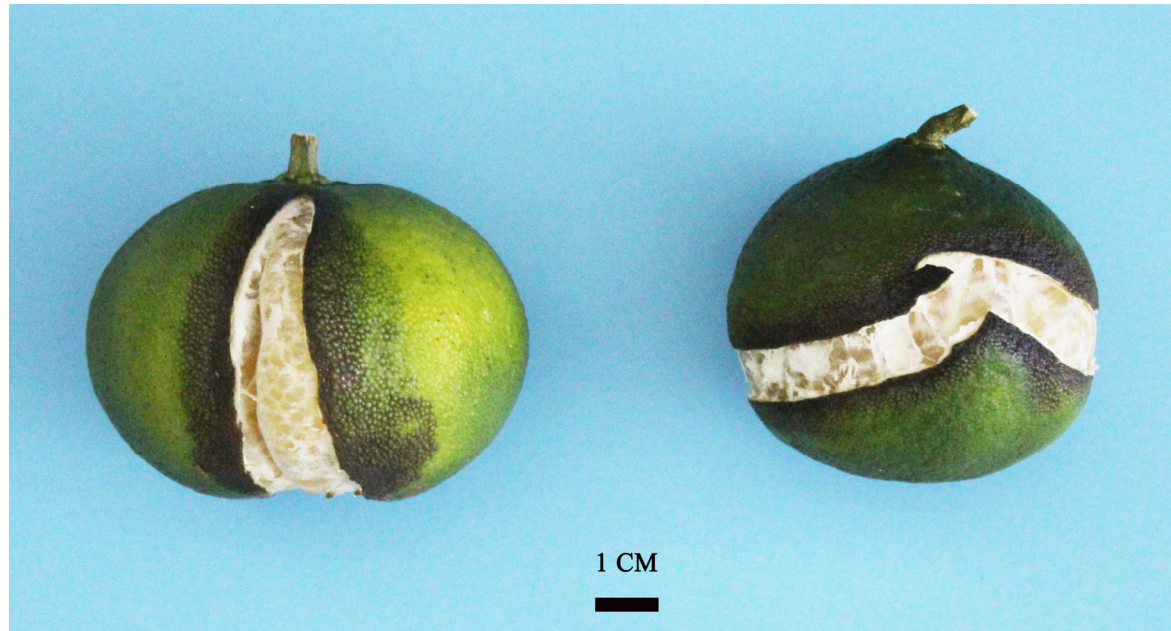

**Figure S1.** Two main appearance characteristics of citrus fruit split (vertical and horizontal). The samples were collected at the peak of fruit splitting during fruit development.

## Tables

**Table S1.** The key DEMs may help to alleviate fruit splitting following treatment with potassium fertilizer.

| Metabolite              | Description                                  | Log2(FC)<br>(Group C/A) | P-value |
|-------------------------|----------------------------------------------|-------------------------|---------|
| Amino acid <sup>a</sup> | gamma-Glutamylphenylalanine                  | 2.20                    | 0.0359  |
|                         | L-Isoleucine                                 | 1.72                    | 0.0375  |
|                         | 5-Hydroxytryptophol                          | 1.58                    | 0.0296  |
|                         | Uridine diphosphate glucose                  | 1.33                    | 0.0337  |
|                         | (±)-Tryptophan                               | 1.35                    | 0.0472  |
|                         | Citrulline                                   | 1.27                    | 0.0329  |
| Hormone <sup>a</sup>    | Cabreuvine                                   | -30.02                  | 0.0385  |
| Glycoside <sup>a</sup>  | Geranyl arabinopyranosyl-glucoside           | -1.71                   | 0.0247  |
|                         | Neryl arabinofuranosyl-glucoside             | -1.64                   | 0.0019  |
|                         | Agavaseponin C                               | 34.52                   | 0.0251  |
|                         | Kaempferol 4'-glucoside 7-rhamnoside         | -31.01                  | 0.0030  |
|                         | Quercetin 3-arabinoside 7-glucoside          | -1.32                   | 0.0468  |
| Flavonoids <sup>a</sup> | 4',5-Dihydroxy-3',5',7,8-tetramethoxyflavone | -1.24                   | 0.0325  |
|                         | 7-Hydroxy-3,3',4',5,6,8-hexamethoxyflavone   | -1.07                   | 0.0085  |
|                         | 5,7-Dihydroxy-3',4',5'-trimethoxyflavone     | -1.52                   | 0.0152  |
| Glycoside <sup>b</sup>  | Arachidoside                                 | 28.81                   | 0.0492  |
|                         | Ranupenin 3-rutinoside                       | 2.35                    | 0.0472  |
|                         | Diosmetin 7-O-beta-D-glucuronopyranoside     | 2.56                    | 0.0401  |
|                         | Quercetin 3-lathyroside                      | 1.83                    | 0.0344  |

Note: The letters a and b indicate that they are derived from the peel and flesh, respectively. DEMs, differentially expressed metabolites; FC, fold-change. For specific information of the fold-change in groups A and C, see Table 1.
